# Supplementary material
Source: publisher site journal article supplement (https://www.dovepress.com/article/464245)
Supplement: Supplementary file 1 [file get_supplementary_file.php]

**Supplementary Appendix A**

Relevant articles were identified using the following search strings:

Searches for articles describing combination or sequential therapy with CPIs + AAs

((nivolumab) OR (pembrolizumab) OR (ipilimumab) OR (atezolizumab) OR (avelumab) OR (durvalumab) OR (tremelimumab) OR (cemiplimab) OR (sintilimab) OR (tislelizumab) OR (toripalimab) OR (spartalizumab) OR (camrelizumab) OR (KN035) OR (ticilimumab) OR (CP-675,206) OR (REGN-2810) OR (IBI308) OR (BGB-A317) OR (JS 100) OR (PRD001) OR (SHR1210)) AND (alkylating agent).

Searches for articles describing combination or sequential therapy with CPIs + HDAC inhibitors

((nivolumab) OR (pembrolizumab) OR (ipilimumab) OR (atezolizumab) OR (avelumab) OR (durvalumab) OR (tremelimumab) OR (cemiplimab) OR (sintilimab) OR (tislelizumab) OR (toripalimab) OR (spartalizumab) OR (camrelizumab) OR (KN035) OR (ticilimumab) OR (CP-675,206) OR (REGN-2810) OR (IBI308) OR (BGB-A317) OR (JS 100) OR (PRD001) OR (SHR1210)) AND (HDAC inhibitor).
